# Supplementary material for: Cell-type specific, inducible and acute degradation of targeted protein in mice by two degron systems
Source: Springer Nature journal article supplement (doi:10.1038/s41467-024-54308-9), 2024-11-29

## **Cell-type specific, inducible and acute degradation of targeted protein in mice by two degron systems.**

Motoi Yamashita, Chihiro Ogawa, Baihao Zhang, Tetsuro Kobayashi, Aneela Nomura, Clive Barker, Chengcheng Zou, Satoshi Yamanaka, Ken-ichiro Hayashi, Yoichi Shinkai, Kazuyo Moro, Sidonia Fargarasan, Koshi Imami, Jun Seita, Fumiyuki Shirai, Tatsuya Sawasaki, Masato T. Kanemaki and Ichiro Taniuchi

### **Supplementary Information**

## Supplementary Figure 1

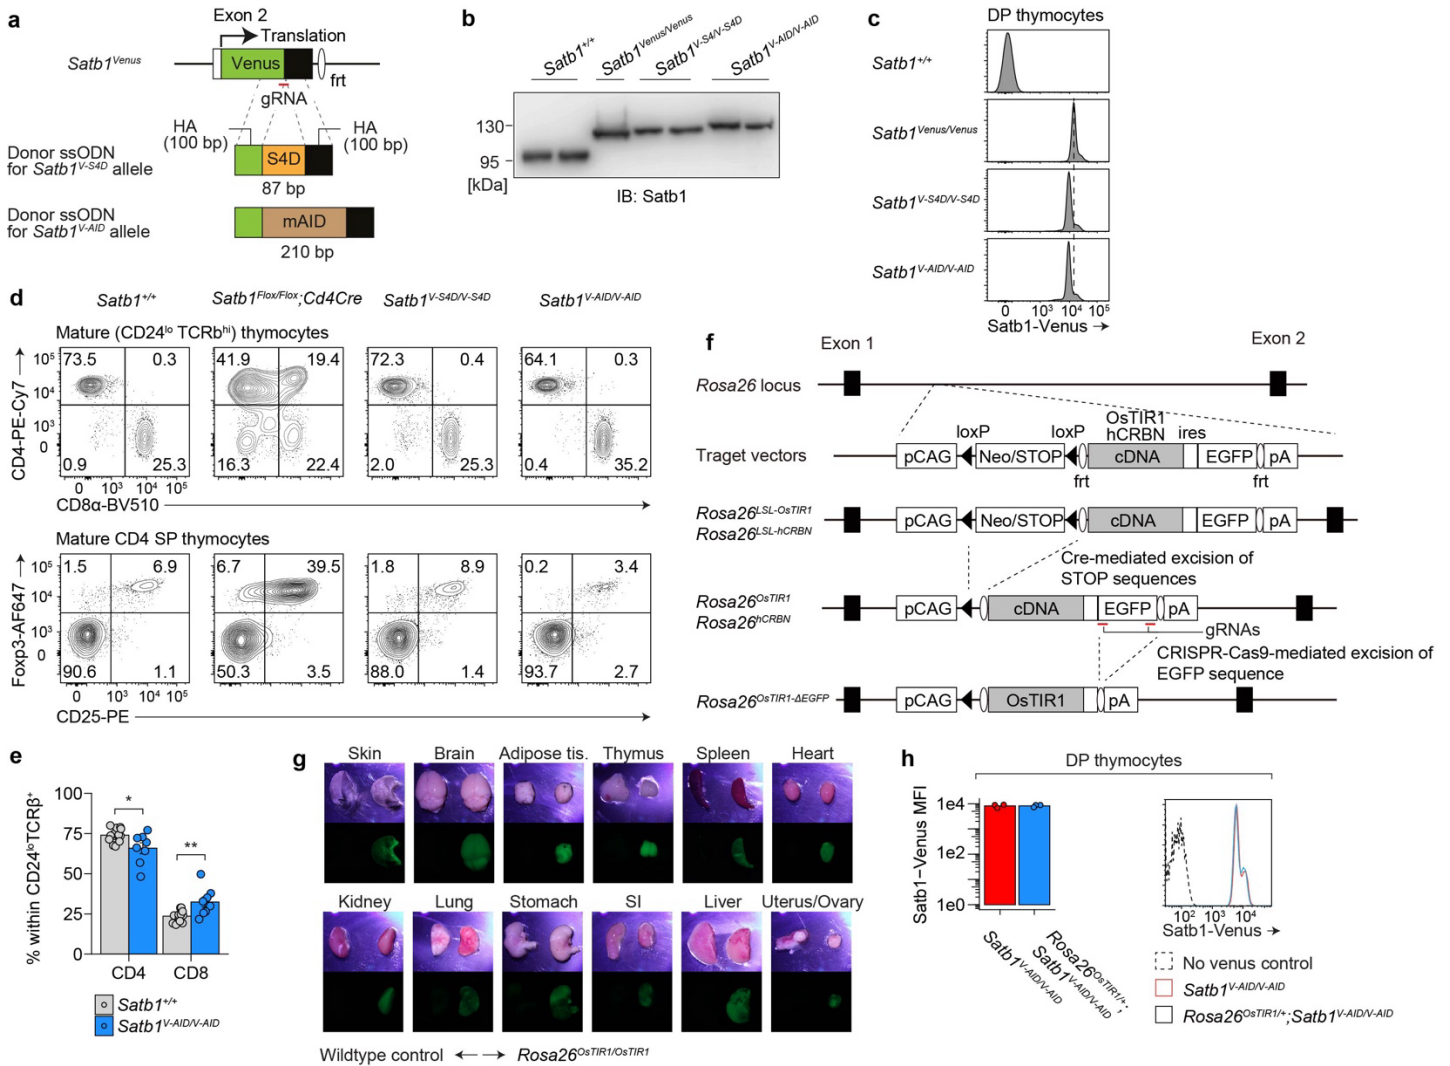

**a**, Schematic diagram of the *Satb1<sup>Venus</sup>* gene and degron sequences knocked in using ssODNs, flanked by 100 bp homology arms (HA) as the template for CRISPR/Cas9-mediated knock-in. The green and black boxes indicate the Venus open reading frame and coding sequence of *Satb1*, respectively. **b**, Immunoblot analysis for *Satb1* in total thymocytes of mice with indicated genotypes. Data are representative of 4 independent experiments. **c**, Expression of *Satb1<sup>Venus</sup>* in CD4<sup>+</sup>CD8<sup>+</sup> double-positive (DP) thymocytes of mice with indicated genotypes. The dashed line indicates the peak level of *Satb1<sup>Venus</sup>* in *Satb1<sup>Venus/Venus</sup>* DP thymocytes. Data are representative of 4 independent experiments. **d**, Flow cytometry analysis of thymocytes of mice with indicated genotypes. The percentages of cells in each quadrant are indicated. Data are representative of 4 independent analyses. **e**, Summary of CD4<sup>+</sup> and CD8<sup>+</sup> single-positive (SP) mature thymocyte fractions in *Satb1<sup>V-AID/V-AID</sup>* mice compared to *Satb1<sup>+/+</sup>* control (n = 14 for *Satb1<sup>+/+</sup>* and n = 8 for *Satb1<sup>V-AID/V-AID</sup>*, p = 0.01032 and 0.002936 for CD4 SP and CD8 SP mature thymocytes, respectively). **f**, Schematic diagram showing the generation of *Rosa26<sup>LSL-OsTIR1</sup>*, *Rosa26<sup>LSL-hCRBN</sup>*, *Rosa26<sup>OsTIR1</sup>*, *Rosa26<sup>hCRBN</sup>*, and *Rosa26<sup>OsTIR1-ΔEGFP</sup>* alleles. **g**, Indicated organs from wildtype and *Rosa26<sup>OsTIR1/OsTIR1</sup>* mice were collected and photographed using a fluorescent stereo microscope. Data are representative of 2 independent biological replicates. **h**, Summary of *Satb1<sup>Venus</sup>* level and representative histograms in DP thymocytes of *Satb1<sup>V-AID/V-AID</sup>* and *Rosa26<sup>OsTIR1/+</sup>;Satb1<sup>V-AID/V-AID</sup>* mice (n = 3 for each genotype). Data are mean ± s.e.m. Statistical analysis was performed using two-sided unpaired *t*-test. \* p < 0.05, \*\* p < 0.005. Source data are provided as a Source Data file. SI, small intestine; tis, tissue.

## Supplementary Figure 2

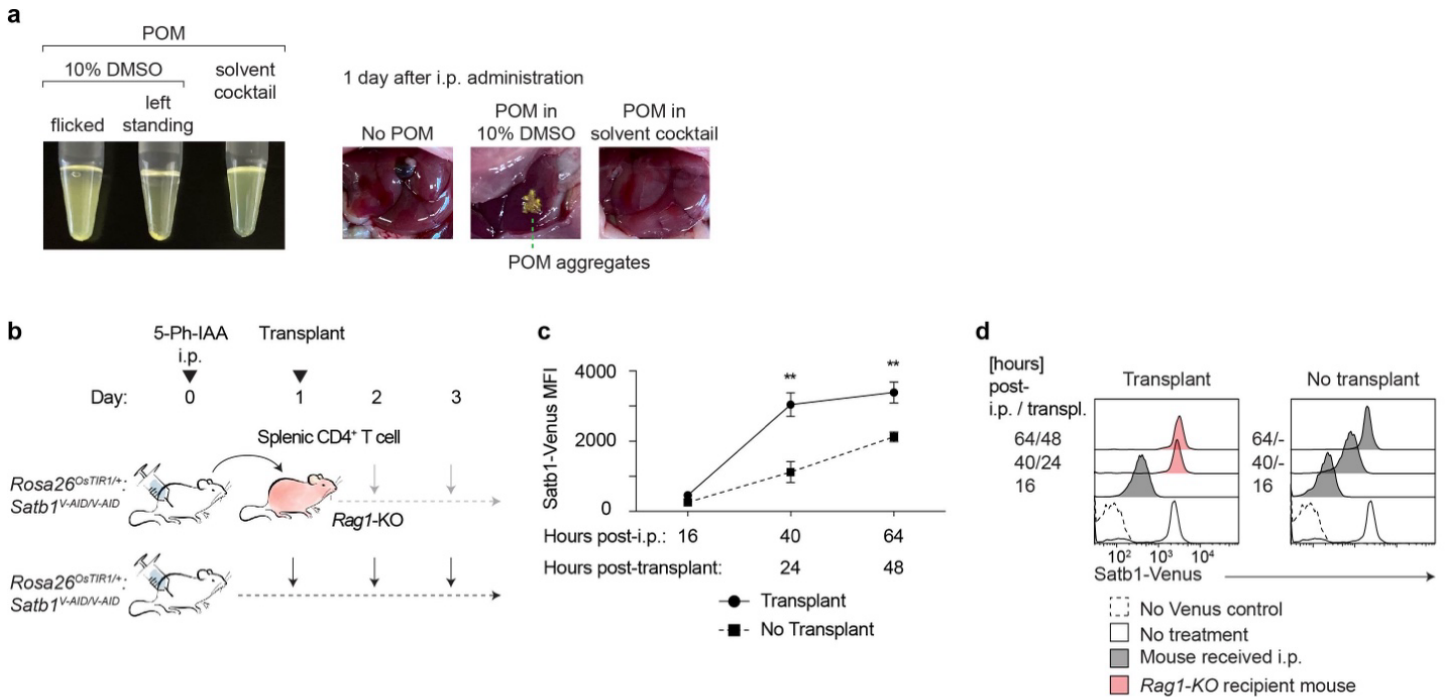

**a**, POM was dissolved in either a standard solvent (10% DMSO in PBS) or a solvent cocktail composed of 15% DMSO, 17.5% Cremophor EL, 8.75% Ethanol, 8.75% HCO-40, and 50% PBS. Photographic images of the peritoneal cavities of mice following intraperitoneal (i.p.) injection of POM dissolved in either the standard solvent or the solvent cocktail. **b-d**, After 1 day post 5-Ph-IAA treatment in *Rosa26<sup>OstTIR1/+</sup>; Satb1<sup>V-AID/V-AID</sup>* mice, splenic CD4<sup>+</sup> T cells were isolated and transplanted to *Rag1*-knockout (KO) mice. Satb1 levels in peripheral blood T cells within the recipient *Rag1* knockout mice were compared with peripheral blood T cells in donor *Rosa26<sup>OstTIR1/+</sup>; Satb1<sup>V-AID/V-AID</sup>* mice (**a**). Graph (**b**;  $n = 3$  for each group,  $p = 0.001811$  and  $0.002725$  for 24 and 48 hours post-transplant, respectively) and a representative histogram (**c**) show the expression of Satb1<sup>Venus</sup> in 5-Ph-IAA treated *Rosa26<sup>OstTIR1/+</sup>; Satb1<sup>V-AID/V-AID</sup>* CD4<sup>+</sup> T cells, in transplanted versus non-transplanted mice. Open histograms represent pre-treatment baseline levels of Satb1<sup>Venus</sup>. Data are representative of 3 independent biological replicates. Data are mean  $\pm$  s.e.m. Statistical analysis was performed using two-sided unpaired *t*-test. \*\*  $p < 0.005$ . Source data are provided as a Source Data file.

transpl., transplant.

## Supplementary Figure 3

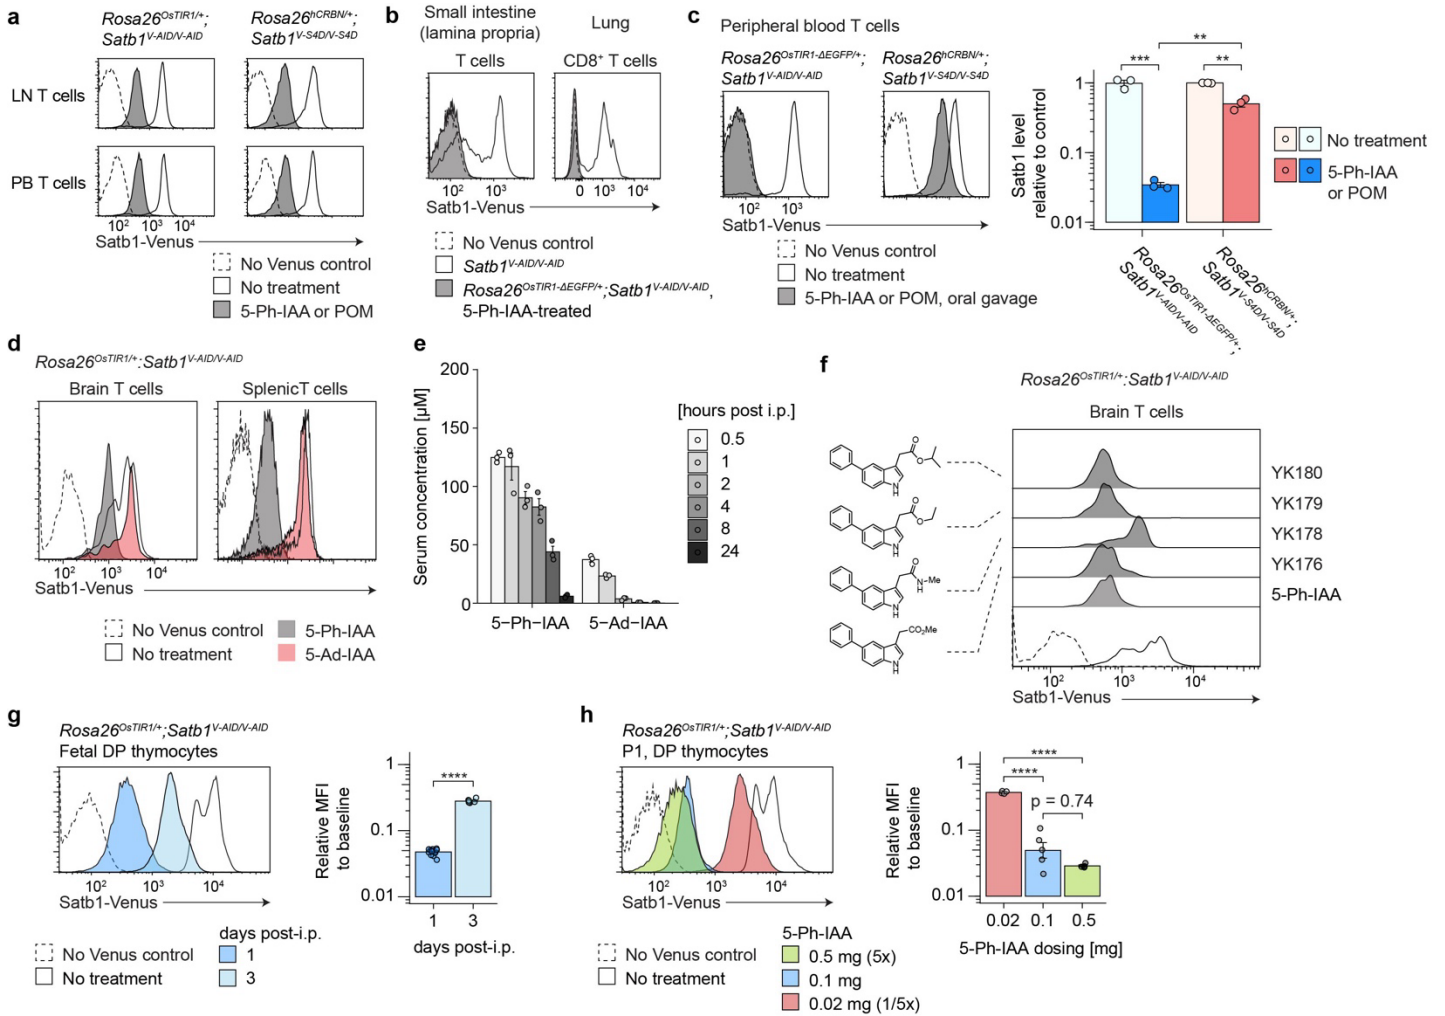

**a**, Satb1<sup>Venus</sup> levels in T cells in lymph nodes (LN) and peripheral blood (PB) 16 hours post-intraperitoneal (i.p.) administration of 5-Ph-IAA and POM in *Rosa26<sup>OsTIR1/+</sup>;Satb1<sup>V-AID/V-AID</sup>* or *Rosa26<sup>hCRBN/+</sup>;Satb1<sup>V-S4D/V-S4D</sup>* mice, respectively. Data are representative of 4 independent biological replicates. **b**, Satb1<sup>Venus</sup> levels in small intestine lamina propria T cells (CD45<sup>+</sup>TCRβ<sup>+</sup>) and lung-resident CD8<sup>+</sup> T cells (CD45<sup>+</sup>TCRβ<sup>+</sup>CD8α<sup>+</sup>CD8β-IV<sup>-</sup>CD44<sup>+</sup>CD69<sup>-</sup>CD103<sup>-</sup>), 16 hours post-intraperitoneal administration of 5-Ph-IAA in *Rosa26<sup>OsTIR1-ΔEGFP/+</sup>;Satb1<sup>V-AID/V-AID</sup>*. Data are representative of 2 independent biological replicates. **c**, Satb1<sup>Venus</sup> levels in PB T cells, 16 hours post-oral gavage administration of 5-Ph-IAA and POM in *Rosa26<sup>OsTIR1-ΔEGFP/+</sup>;Satb1<sup>V-AID/V-AID</sup>* or *Rosa26<sup>hCRBN/+</sup>;Satb1<sup>V-S4D/V-S4D</sup>* mice, respectively. Data are representative of 3 independent biological replicates. Graphs represent Satb1<sup>Venus</sup> levels relative to baseline (n = 3 for each group, p = 0.0004957 and 0.0007506 for no-treatment vs treatment groups of the OsTIR1-AID2 and hCRBN-S4D systems, respectively. p = 0.0009114 for the OsTIR1-AID2 vs hCRBN-S4D systems treatment groups). **d**, Satb1<sup>Venus</sup> levels in brain T cells and splenic T cells were examined after 8 hours post 5-Ph-IAA- or 5-Ad-IAA-intraperitoneal injection in *Rosa26<sup>OsTIR1/+</sup>;Satb1<sup>V-AID/V-AID</sup>* mice. **e**, Plasma concentration of 5-Ph-IAA or 5-Ad-IAA following a single intraperitoneal administration in wild-type mice (n = 3 for each group and time points). **f**, Satb1<sup>Venus</sup> levels in brain T cells were examined after 6 hours post intraperitoneal injection of 5-Ph-IAA- or other auxin derivatives in *Rosa26<sup>OsTIR1/+</sup>;Satb1<sup>V-AID/V-AID</sup>* mice. **g**, Pregnant mice received intraperitoneal injections of 5-Ph-IAA, and Satb1<sup>Venus</sup> levels in fetal DP thymocytes were assessed either 1 day post-injection (injected at 16.5 days post coitum [dpc] and analyzed at 17.5 dpc), or 3 days post-injection (injected at 15.5 dpc and analyzed at 18.5 dpc).

The histograms shown are representative of 13 biological replicates for the 1-day analysis and 7 biological replicates for the 3-day analysis. Graphs represent Satb1<sup>Venus</sup> levels relative to baseline ( $p = < 2.2e-16$ ). **h**, Lactating mice received intraperitoneal injections of 5-Ph-IAA at specified doses, and Satb1<sup>Venus</sup> levels in neonatal DP thymocytes were assessed either 1 day post-injection. The histograms shown are representative of 6, 5, and 7 biological replicates for 0.5 mg, 0.1 mg, and 0.02 mg of 5-Ph-IAA, respectively. Graphs represent Satb1<sup>Venus</sup> levels relative to baseline ( $p = 3.35e-07$  and  $F = 47.25$ ). Data are mean  $\pm$  s.e.m. Statistical analyses were performed using two-sided unpaired *t*-test (**c**, **g**), or two-sided one-way ANOVA followed by multiple comparisons test using Tukey's 'Honest Significant Difference' method (**h**). \*\*  $p < 0.005$ , \*\*\*  $p < 0.0005$ , \*\*\*\*  $p < 0.00005$ . Source data are provided as a Source Data file.



## Supplementary Figure 4

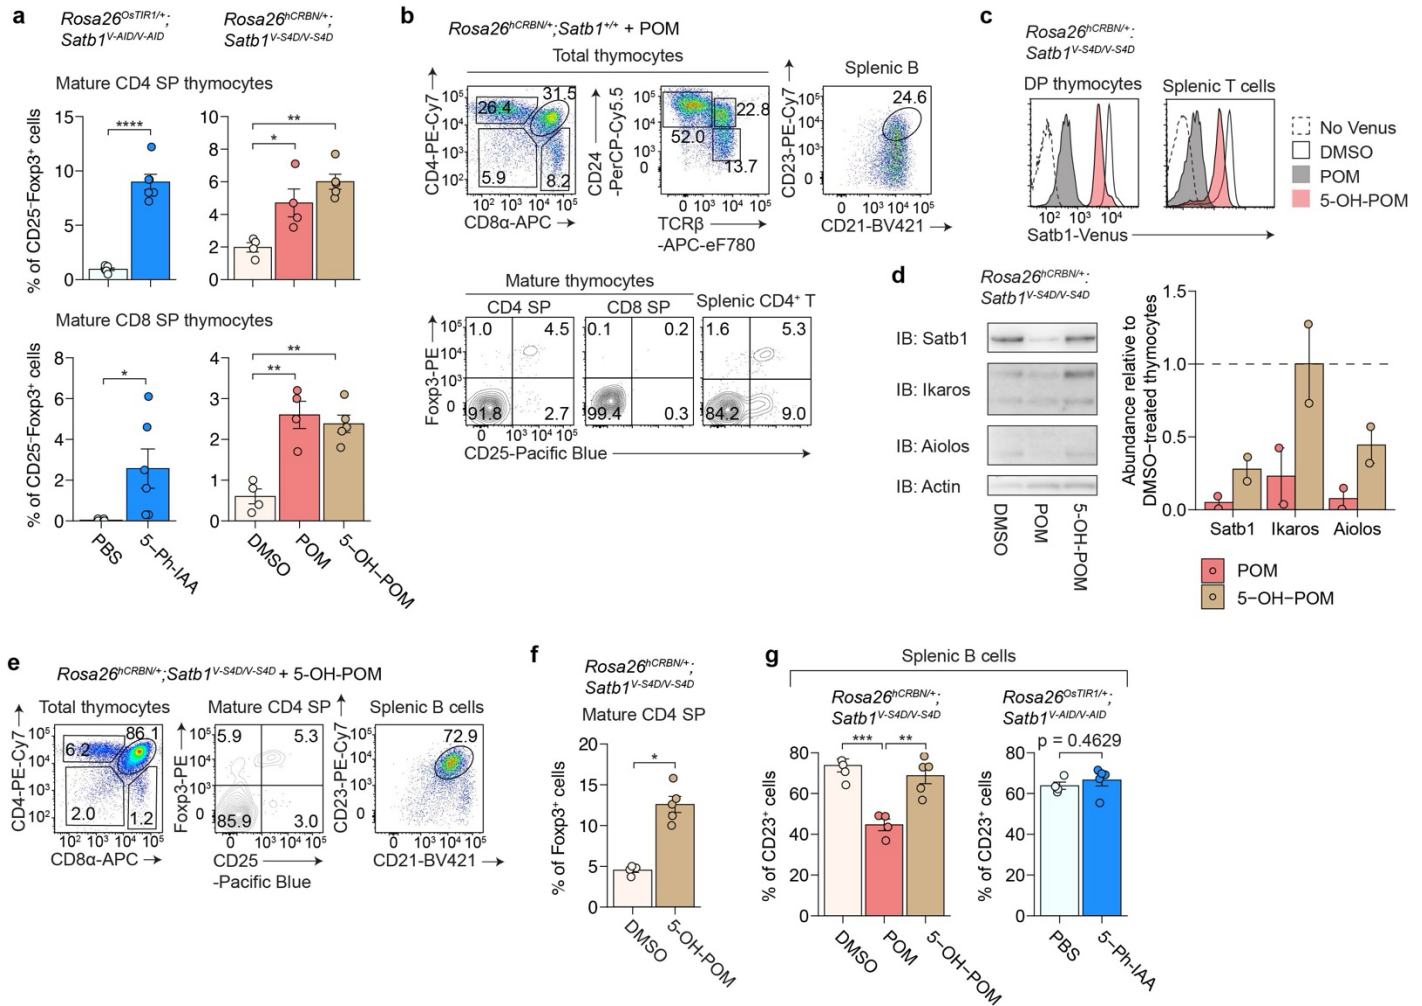

**a**, Summary of CD25-Foxp3<sup>+</sup> cell fractions within mature CD4 SP and CD8 SP thymocytes following 3-day treatment with 5-Ph-IAA and POM or 5-OH-POM in *Rosa26<sup>OsTIR1/+</sup>; Satb1<sup>V-AID/V-AID</sup>* or *Rosa26<sup>hCRBN/+</sup>; Satb1<sup>V-S4D/V-S4D</sup>* mice, respectively (n = 6 each for PBS- and 5-Ph-IAA-group in the OsTIR1-AID2 system; n = 4 each for DMSO- and POM-group and n = 5 for 5-OH-POM-group in the hCRBN-S4D system, respectively; p = 6.659e-07 and 0.02519 for PBS vs 5-Ph-IAA in mature CD4 SP and CD8 SP, respectively; p = 0.00164 and F = 13.03, and p = 0.000423 and F = 18.64 for CD4 SP and CD8 SP in the hCRBN-S4D system). **b**, Flow cytometry analysis of thymocytes and splenic T and B cells following 3-day treatment with POM in *Rosa26<sup>hCRBN/+</sup>; Satb1<sup>+/+</sup>* mice. The percentages of cells in each quadrant and gating are indicated. Data are representative of 2 independent biological replicates. **c**, Satb1<sup>Venus</sup> levels in DP thymocytes and splenic T cells after 3 days of POM or 5-OH-POM treatment in *Rosa26<sup>hCRBN/+</sup>; Satb1<sup>V-S4D/V-S4D</sup>* mice. Data are representative of at least 4 independent biological replicates (n = 4 each for DMSO- and POM-group, and n = 5 for 5-OH-POM-group). **d**, Immunoblot analysis of Satb1, Ikaros, Aiolos, and Actin in total thymocytes of *Rosa26<sup>hCRBN/+</sup>; Satb1<sup>V-S4D/V-S4D</sup>* mice treated with POM or 5-OH-POM. Data are representative of 2 independent experiments. On the right, abundance of Satb1, Ikaros, and Aiolos was quantified by densitometry and normalized by Actin levels. **e**, Flow cytometry analysis of thymocytes and splenic lymphocytes after 3 days of 5-OH-POM treatment in *Rosa26<sup>hCRBN/+</sup>; Satb1<sup>V-S4D/V-S4D</sup>* mice. The percentages of cells in each quadrant and gating are indicated. Data are representative of 5 independent biological replicates. **f**, Summary of Foxp3<sup>+</sup> cell fractions within mature CD4 SP thymocytes in *Rosa26<sup>hCRBN/+</sup>; Satb1<sup>V-S4D/V-S4D</sup>* mice after 3 days of 5-OH-POM treatment (n = 4 for DMSO-

group and n = 5 for 5-OH-POM-group; p = 0.00658 and F = 8.655, related to **Fig. 3b**). **g**, Summary of CD23<sup>+</sup> cell fractions within splenic B cells in *Rosa26<sup>OsTIR1/+</sup>;Satb1<sup>V-AID/V-AID</sup>* and *Rosa26<sup>hCRBN/+</sup>;Satb1<sup>V-S4D/V-S4D</sup>* mice after 3-day-treatment with indicated ligands (n = 4 and 5 for PBS- and 5-Ph-IAA-group in the OsTIR1-AID2 system, respectively; n = 4 each for DMSO- and POM-group and n = 5 for 5-OH-POM-group in the hCRBN-S4D system, respectively; p = 0.4629 for the PBS- and 5-Ph-IAA-group in the OsTIR1-AID2 system ; p = 0.000282, F = 18.81 for the hCRBN-S4D system). Data are mean ± s.e.m. Statistical analyses were performed using two-sided unpaired *t*-test (for *Rosa26<sup>OsTIR1/+</sup>;Satb1<sup>V-AID/V-AID</sup>* in **a, g**), or two-sided one-way ANOVA followed by multiple comparisons test using Tukey's 'Honest Significant Difference' method (for *Rosa26<sup>hCRBN/+</sup>;Satb1<sup>V-S4D/V-S4D</sup>* mice in **a, f, g**). \* p <0.05, \*\* p <0.005, \*\*\* p <0.0005, \*\*\*\* p <0.00005. Source data are provided as a Source Data file.

## Supplementary Figure 5

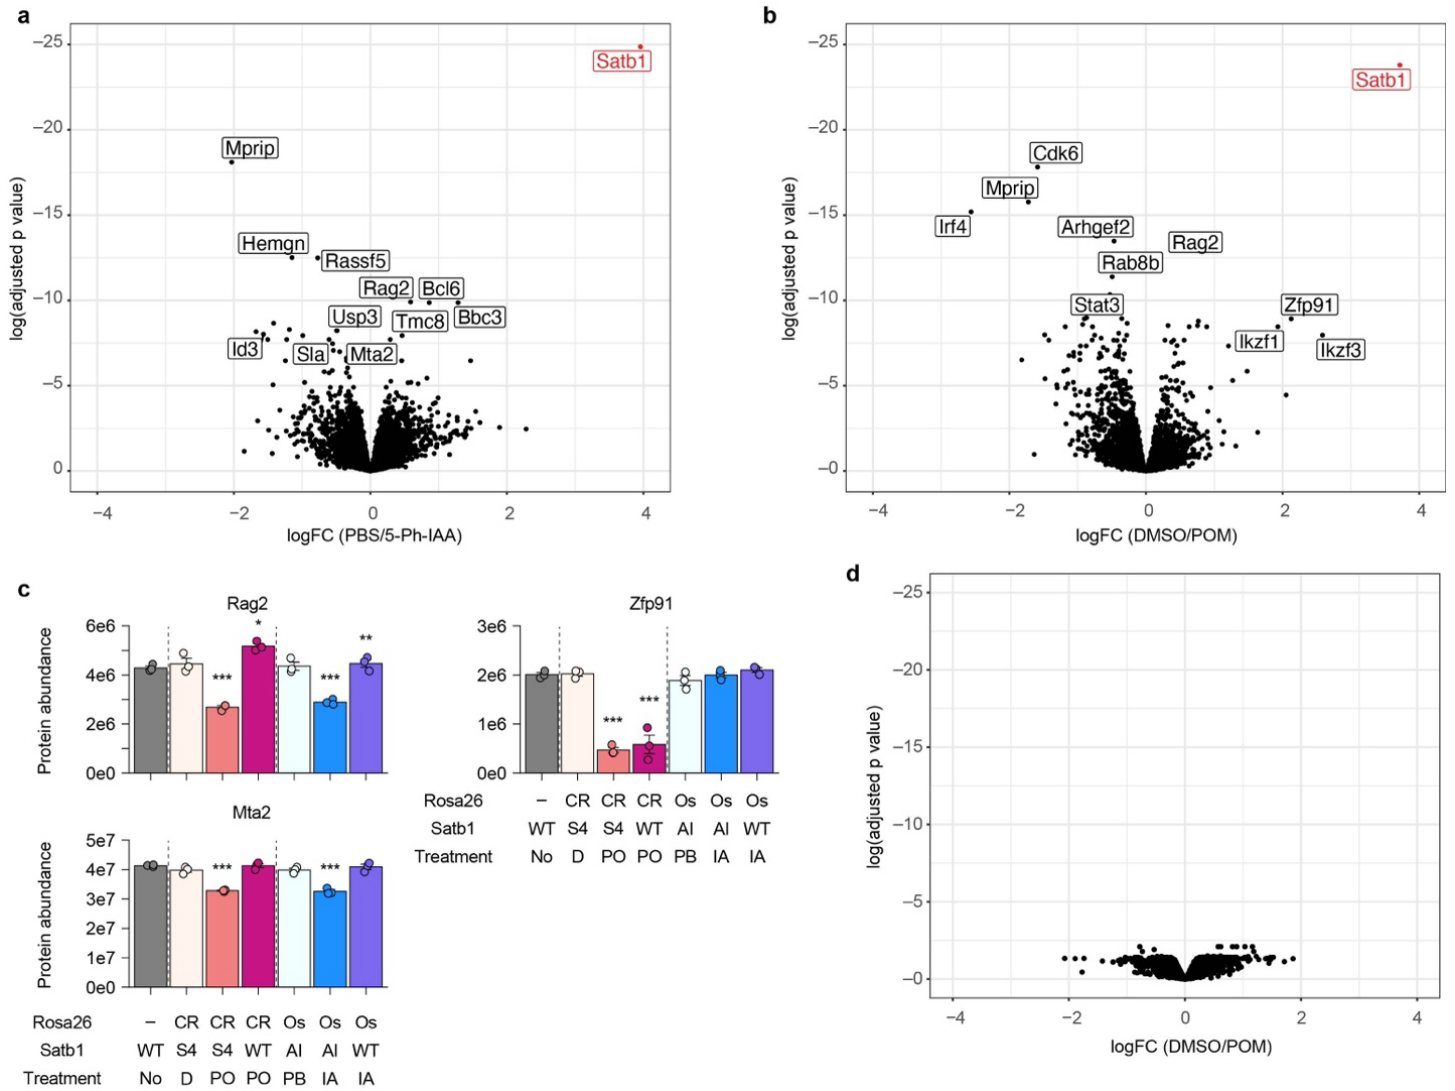

Total thymocytes and brain were collected 16 hours post-treatment with 5-Ph-IAA or POM and subjected to proteomics analysis ( $n = 3$  for each condition). **a**, Volcano plot shows global changes in protein expression in thymocytes from *Rosa26<sup>OsTIR1/+</sup>;Satb1<sup>V-AID/V-AID</sup>* mice treated with PBS or with 5-Ph-IAA. Proteins that showed a significant difference with an adjusted P value of  $<0.0005$  are indicated. Satb1 is highlighted in red. **b**, Volcano plot shows global changes in protein expression in total thymocytes from *Rosa26<sup>hCRBN/+</sup>;Satb1<sup>V-S4D/V-S4D</sup>* mice treated with DMSO or with POM. Proteins that showed a significant difference with an adjusted P value of  $<0.0001$  are indicated. Satb1 is highlighted in red. **c**, The abundances of Rag2, Zfp91, and Mta2 in the thymus of indicated genotypes and treatments. Treatment groups were compared to their respective controls (DMSO-treated *Rosa26<sup>hCRBN/+</sup>;Satb1<sup>V-S4D/V-S4D</sup>* for the hCRBN-S4D system and PBS-treated *Rosa26<sup>OsTIR1/+</sup>;Satb1<sup>V-AID/V-AID</sup>* for the OsTIR1-AID2 system).  $P = 0.000354$  and  $F = 39.42$  for Rag2 in the OsTIR1-AID2 system;  $p = 5.7e-05$  and  $F = 74.94$  for Rag2 in the hCRBN-S4D system;  $p = 2.16e-06$  and  $F = 229$  for Mta2 in the OsTIR1-AID2 system;  $p = 0.000308$  and  $F = 41.44$  for Mta2 in the hCRBN-S4D system;  $p = 0.189$  and  $F = 2.227$  for Zfp91 in the OsTIR1-AID2 system;  $p = 0.000139$  and  $F = 54.94$  for Zfp91 in the hCRBN-S4D system. **d**, Volcano plot shows global changes in protein expression in whole cerebral tissue from *Rosa26<sup>hCRBN/+</sup>;Satb1<sup>+/+</sup>* mice treated with DMSO and those treated with POM ( $n = 3$  for each condition). Data are mean  $\pm$  s.e.m. Statistical analyses were performed using two-sided empirical Bayes moderated t-statistics (**a**,



**b, d**), or two-sided one-way ANOVA followed by Dunnett's multiple comparisons test (**c**). \*\*  $p < 0.005$ , \*\*\*  $p < 0.0005$ , \*\*\*\*  $p < 0.00005$ . Source data are provided as a Source Data file.

CR, *Rosa26<sup>hCRBN/+</sup>*; Os, *Rosa26<sup>OsTIR1/+</sup>*; WT, *Satb1<sup>+/+</sup>*; S4, *Satb1<sup>V-S4D/V-S4D</sup>*; AI, *Satb1<sup>V-AID/V-AID</sup>*; No, no treatment; PO, POM; IA, 5-Ph-IAA.

## Supplementary Figure 6

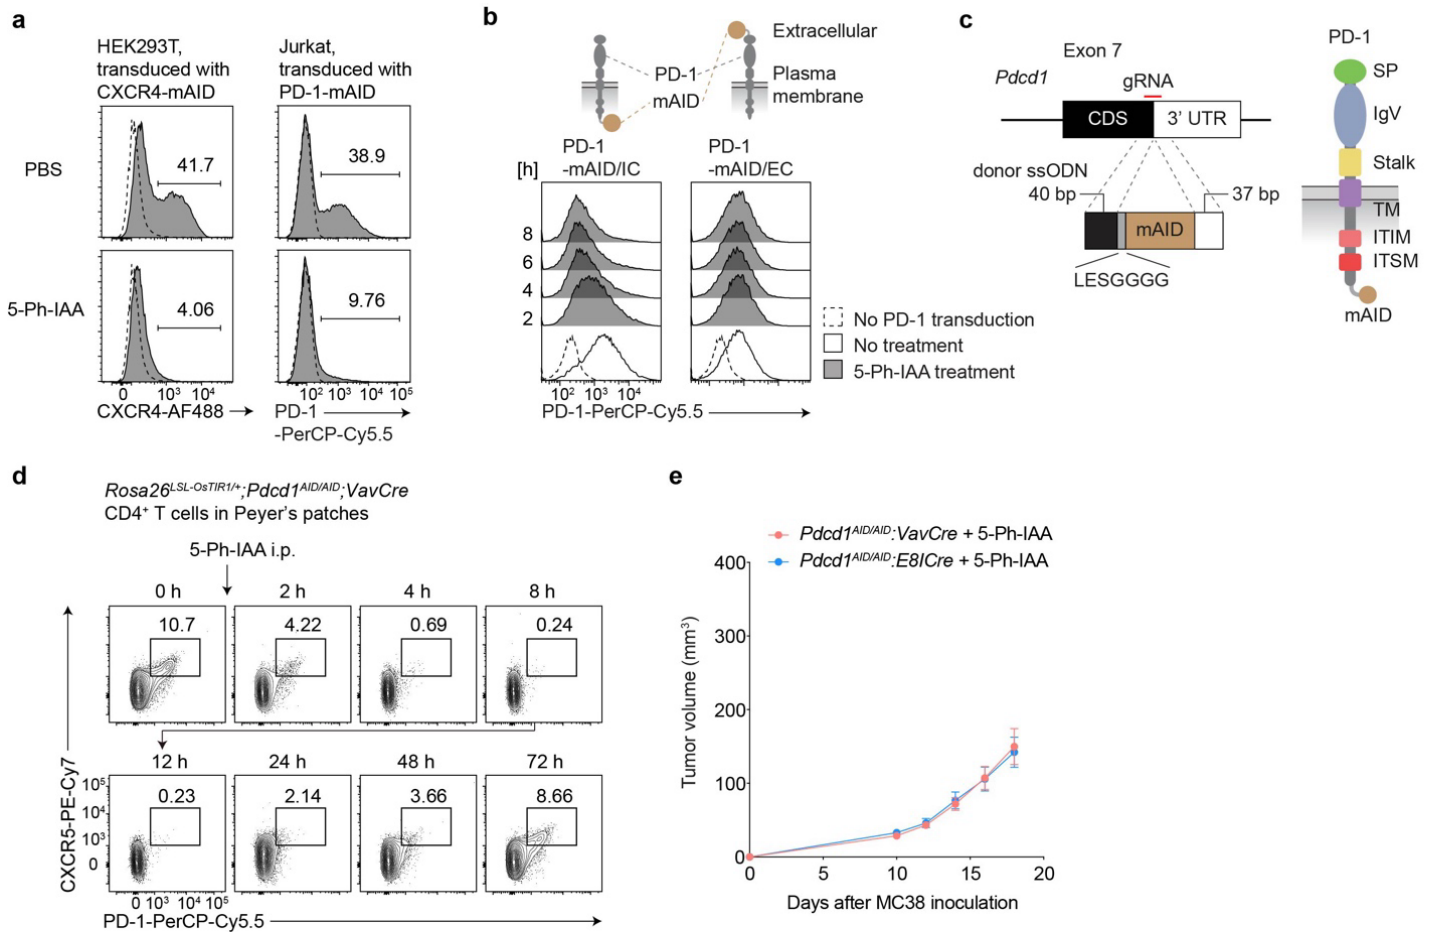

**a**, mAID-tagged PD-1 and mAID-tagged CXCR4 were transduced and expressed in Jurkat or HEK293T cells, respectively, and were treated with either 1  $\mu$ M of 5-Ph-IAA or PBS. CXCR4 and PD-1 expression levels analyzed using flow cytometry. **b**, mAID was fused to either the C-terminus (intracellular domain) or N-terminus (extracellular domain) of PD-1, and the degradation in transduced Jurkat cells was analyzed at specified time points following the addition of 1  $\mu$ M 5-Ph-IAA to the culture medium. **c**, Schematic diagram of *Pdcd1* exon 7 and ssODN with mAID sequence flanked by homology arms as the template for CRISPR/Cas9-mediated knock-in. The black and white boxes represent the C-terminal (cytoplasmic) end of the *Pdcd1* coding sequence and 3' UTR, respectively. The diagram on the right illustrates the structure of PD-1 protein with an mAID tag attached to its cytoplasmic tail. **d**, Following a single intraperitoneal injection of 5-Ph-IAA in *Rosa26<sup>LSL-OsTIR1/+</sup>;Pdcd1<sup>AID/AID</sup>;VavCre* mice, the expression of PD-1 and CXCR5 was examined in CD4<sup>+</sup> T cells within Peyer's patches at the indicated time points. **e**, MC38-bearing *Rosa26<sup>LSL-OsTIR1/+</sup>;Pdcd1<sup>AID/AID</sup>;E8ICre* and *Rosa26<sup>LSL-OsTIR1/+</sup>;Pdcd1<sup>AID/AID</sup>;VavCre* mice received intraperitoneal (i.p.) injection of 5-Ph-IAA every two days, starting from 10 days after tumor inoculation. The targeted degradation of PD-1 in CD8<sup>+</sup> T cells versus all hematopoietic cells showed comparable anti-tumor effects (n = 13 for *VavCre* group and n = 11 for *E8ICre* group). Source data are provided as a Source Data file. EC, extracellular; IC, intracellular; IgV, immunoglobulin V-like domain; ITIM, immunoreceptor tyrosine-based inhibitory motif; ITSM, immunoreceptor tyrosine-based switch motif; SP, signal peptide; TM, transmembrane

## Supplementary Figure 7

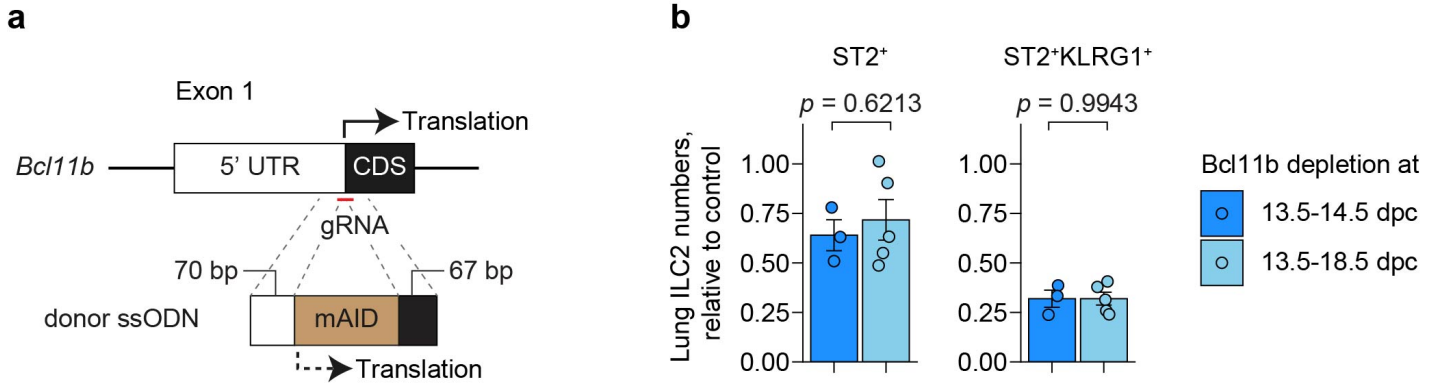

**a**, Schematic diagram of *Bcl11b* exon 1 and ssODN with mAID sequence flanked by homology arms as the template for CRISPR/Cas9-mediated knock-in. The black and white boxes represent the N-terminal end of the *Bcl11b* coding sequence and 5' UTR, respectively. **b**, Pregnant mice carrying *Rosa26<sup>LSL-OsTIR1/LSL-OsTIR1</sup>;Bcl11b<sup>AID/AID</sup>;VavCre<sup>+/or-</sup>* fetuses received daily intraperitoneal injections of 5-Ph-IAA from 13.5 to 18.5 days post coitum (dpc). The total numbers of lung-derived CD45<sup>+</sup>CD3<sup>-</sup>Thy1.2<sup>+</sup>ST2<sup>+</sup> and CD45<sup>+</sup>CD3<sup>-</sup>Thy1.2<sup>+</sup>ST2<sup>+</sup>KLRG1<sup>+</sup> ILC2s in *Rosa26<sup>LSL-OsTIR1/LSL-OsTIR1</sup>;Bcl11b<sup>AID/AID</sup>;VavCre* offsprings (n = 5), compared to *Rosa26<sup>LSL-OsTIR1/LSL-OsTIR1</sup>;Bcl11b<sup>AID/AID</sup>* offsprings (n = 3), were assessed at 3 weeks of age, and compared to those in *Rosa26<sup>LSL-OsTIR1/LSL-OsTIR1</sup>;Bcl11b<sup>AID/AID</sup>;VavCre* offsprings (n = 3) that underwent *Bcl11b* depletion from 13.5 to 14.5 dpc, as shown in **Fig. 6e** (p = 0.6213 and 0.9943 for ST2<sup>+</sup> and ST2<sup>+</sup>KLRG1<sup>+</sup> ILC2, respectively). Data are mean ± s.e.m. Statistical analysis was performed using two-sided unpaired *t*-test. Source data are provided as a Source Data file.

Supplementary Figure 8

Satb1 degran study

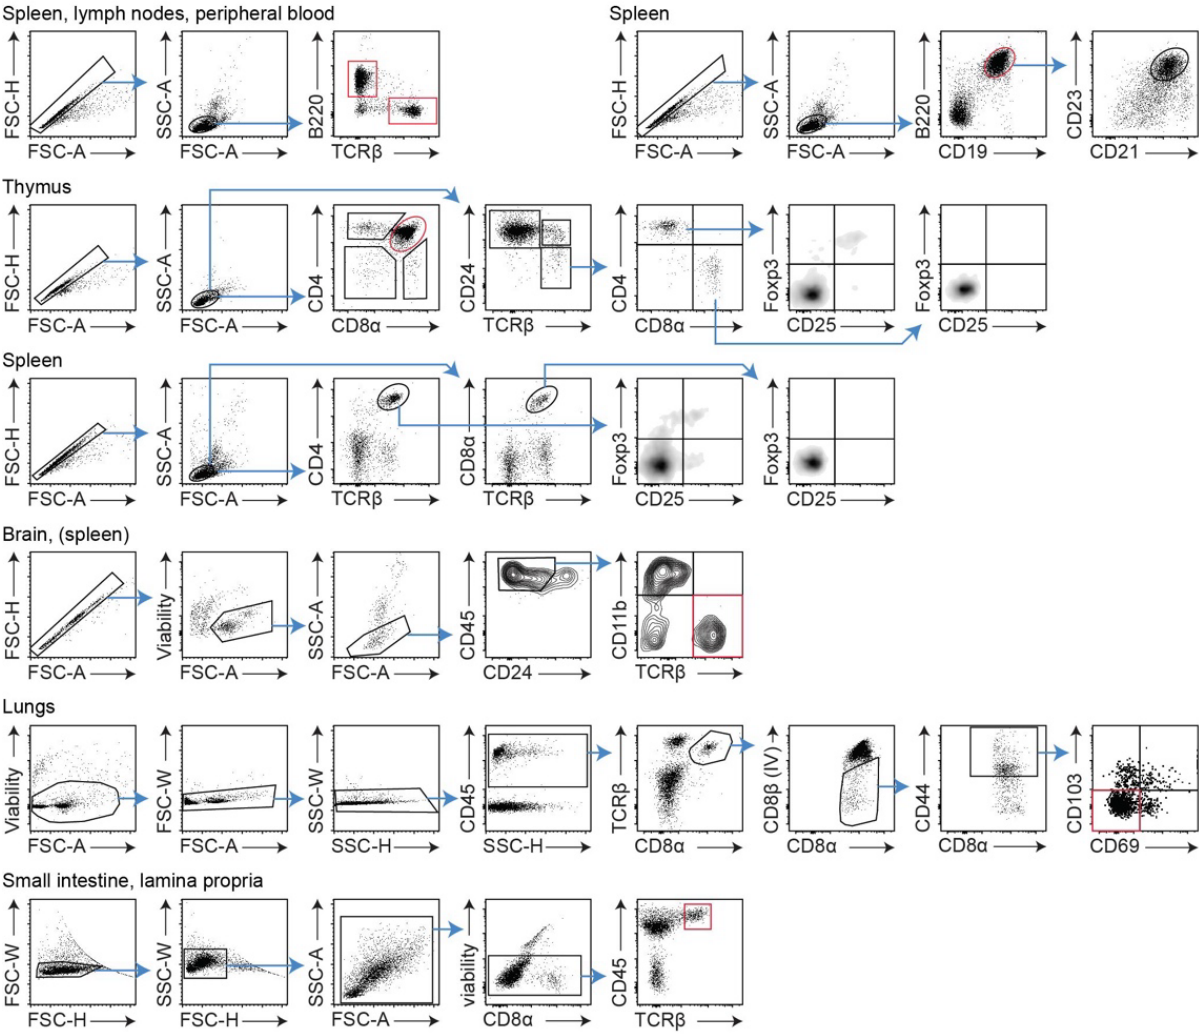

### PD-1 degon study

Peyer's patches

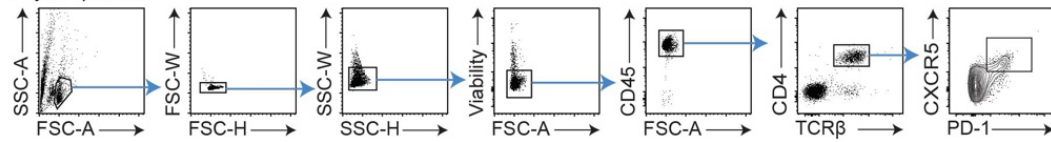

Tumor tissue

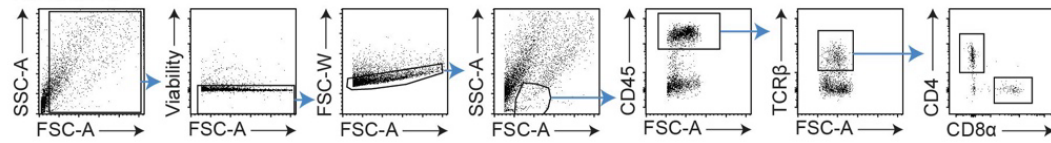

Tumor tissue

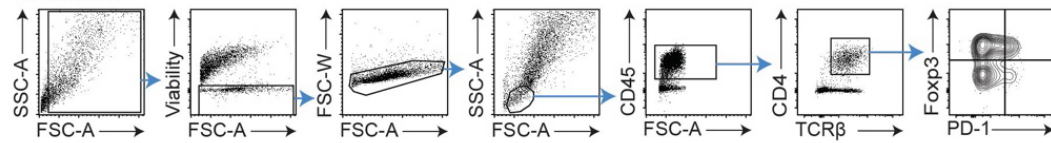

Tumor tissue

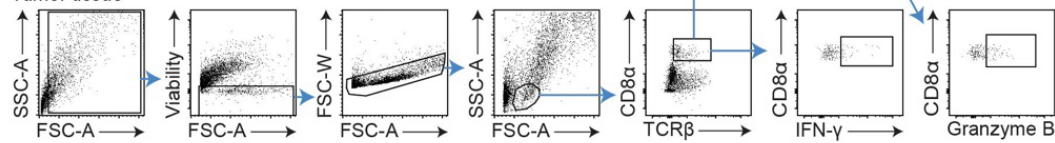

### Bcl11b degon study

Thymus

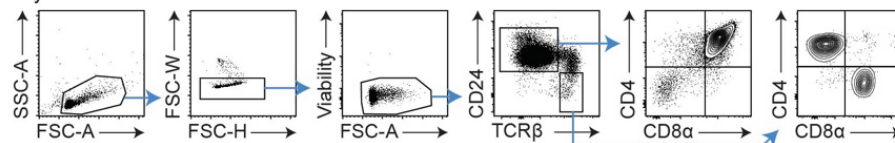

Thymus

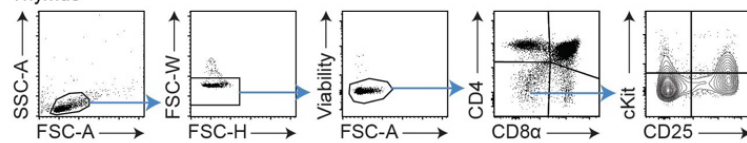

Lungs

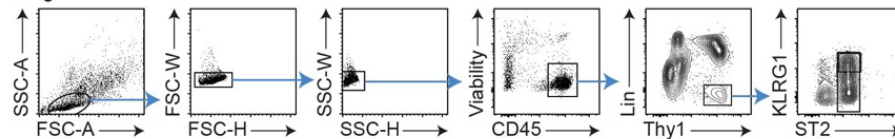

Flow cytometry gating strategy. For Satb1 degon study, populations assessed for Satb1 expression are highlighted by red demarcation.

IV, intravenous

Supplementary Table 1

| Guide sequences                      |                                                                                                                                                                                                                                                                                                                                                                                                                                                                                                                                                                                                                                                                                                                                                                                                                                                                                                                                                                                                                                                                                                                                                                                                                                                                                                                                                                                                                                                                                                                                                                                                                                                                                                                                                                                                   |
|--------------------------------------|---------------------------------------------------------------------------------------------------------------------------------------------------------------------------------------------------------------------------------------------------------------------------------------------------------------------------------------------------------------------------------------------------------------------------------------------------------------------------------------------------------------------------------------------------------------------------------------------------------------------------------------------------------------------------------------------------------------------------------------------------------------------------------------------------------------------------------------------------------------------------------------------------------------------------------------------------------------------------------------------------------------------------------------------------------------------------------------------------------------------------------------------------------------------------------------------------------------------------------------------------------------------------------------------------------------------------------------------------------------------------------------------------------------------------------------------------------------------------------------------------------------------------------------------------------------------------------------------------------------------------------------------------------------------------------------------------------------------------------------------------------------------------------------------------|
| <i>hCRBN-AirID</i> stop codon        | ACTTTGCTTGGGTACCATGA                                                                                                                                                                                                                                                                                                                                                                                                                                                                                                                                                                                                                                                                                                                                                                                                                                                                                                                                                                                                                                                                                                                                                                                                                                                                                                                                                                                                                                                                                                                                                                                                                                                                                                                                                                              |
| <i>Satb1<sup>V-AID</sup></i>         | ATTTGAACGAGGCAACTCAG                                                                                                                                                                                                                                                                                                                                                                                                                                                                                                                                                                                                                                                                                                                                                                                                                                                                                                                                                                                                                                                                                                                                                                                                                                                                                                                                                                                                                                                                                                                                                                                                                                                                                                                                                                              |
| <i>Satb1<sup>V-S4D</sup></i>         | ATTTGAACGAGGCAACTCAG                                                                                                                                                                                                                                                                                                                                                                                                                                                                                                                                                                                                                                                                                                                                                                                                                                                                                                                                                                                                                                                                                                                                                                                                                                                                                                                                                                                                                                                                                                                                                                                                                                                                                                                                                                              |
| <i>Bcl11b<sup>AID</sup></i>          | TTTGCGGCGGGACATTGCC                                                                                                                                                                                                                                                                                                                                                                                                                                                                                                                                                                                                                                                                                                                                                                                                                                                                                                                                                                                                                                                                                                                                                                                                                                                                                                                                                                                                                                                                                                                                                                                                                                                                                                                                                                               |
| <i>PD-1<sup>AID</sup></i>            | GCTGAAGAATCTGGTCAAAG                                                                                                                                                                                                                                                                                                                                                                                                                                                                                                                                                                                                                                                                                                                                                                                                                                                                                                                                                                                                                                                                                                                                                                                                                                                                                                                                                                                                                                                                                                                                                                                                                                                                                                                                                                              |
| <i>Rosa26<sup>OSTIR1-AEGFP</sup></i> | TGATAATATGGCCACAACCA, CATGCCGAGAGTGATCCCGG                                                                                                                                                                                                                                                                                                                                                                                                                                                                                                                                                                                                                                                                                                                                                                                                                                                                                                                                                                                                                                                                                                                                                                                                                                                                                                                                                                                                                                                                                                                                                                                                                                                                                                                                                        |
| ssODNs                               |                                                                                                                                                                                                                                                                                                                                                                                                                                                                                                                                                                                                                                                                                                                                                                                                                                                                                                                                                                                                                                                                                                                                                                                                                                                                                                                                                                                                                                                                                                                                                                                                                                                                                                                                                                                                   |
| <i>hCRBN-AirID</i> stop codon        | GGGCTTAACGCGATCTGCTCTGTTGCCACGATCCCAGACACTGAAGATGAAATAAGTCCAGACAAAGTAATACTTTGCTGTGTAAACCATGAAGGACAACACCGTTCGGCTCACGCTTATCTCTATCCTTGCTGATGGTGAGTTCCTACTCTGGTGAACTTGG                                                                                                                                                                                                                                                                                                                                                                                                                                                                                                                                                                                                                                                                                                                                                                                                                                                                                                                                                                                                                                                                                                                                                                                                                                                                                                                                                                                                                                                                                                                                                                                                                               |
| <i>Satb1<sup>V-AID</sup></i>         | CGCCCTGAGCAAAGACCCCAACGAGAAGCGCGATCACATGGTCTGCTGGAGTTCGTGACCGCCGCCGGGATCACTCTCGGCATGGACGAGCTGTACAAGGGCTCAAAGGAGAAGAGTGCTTGTCTCTAAAGATCCAGCCAAACCTCCGGCCAAGGCACAAGTTGTGGGATGGCCACCGGTGAGATCATACCGGAAGAACGTGATGGTTTCTGCCAAAAATCAAGCGGTGGCCGAGGCGCGGCTTCGTGAAGGTATCAATGCATTTGAACGAAGCAACACAAGGGAAAGAACATTCAGAAATGTCTAACAAATGTGAGTGATCCGAAGGGTCCACCCGC                                                                                                                                                                                                                                                                                                                                                                                                                                                                                                                                                                                                                                                                                                                                                                                                                                                                                                                                                                                                                                                                                                                                                                                                                                                                                                                                                                                                                                                |
| <i>Satb1<sup>V-S4D</sup></i>         | CGCCCTGAGCAAAGACCCCAACGAGAAGCGCGATCACATGGTCTGCTGGAGTTCGTGACCGCCGCCGGGATCACTCTCGGCATGGACGAGCTGTACAAGGGCTCATTCGTGTGCTCTGTCTGTGGTTCATCGCTTACCACCAAGGGCAACCTCAAGGTGCACTTTACCGACATCCCCAGGTGAAGGCACATTTGAACGAAGCAACACAAGGGAAAGAACATTCAGAAATGTCTAACAAATGTGAGTGATCCGAAGGGTCCACCCGCCAAGATTGCCCGCCTGGAGCAGA                                                                                                                                                                                                                                                                                                                                                                                                                                                                                                                                                                                                                                                                                                                                                                                                                                                                                                                                                                                                                                                                                                                                                                                                                                                                                                                                                                                                                                                                                                 |
| <i>Bcl11b<sup>AID</sup></i>          | CGGCTCAGACCCCTCCCGGCCCGCATCTGTGCAGCTTTCCGGGCGATGCCAGAATAGATGCCGGGGCAATGAAGGAAGAAGAGTGCTTGTCTAAAGATCCAGCCAAACCTCCGGCCAAGGCACAAGTTGTGGGATGGCCACCGGTGAGATCATACCGGAAGAACGTGATGGTTTCTGCCAAAAATCAAGCGGTGGCCCGGAGGCGGCGGCTTCGTGAAGGTATCAATGGACGGAGCACCGTACCGGAGCACCGTACTTGAGGAAAATCGATTTGAGGATGTATAAAGGCTCATCCCGCCGCAACAGGGCAACCCGCAGCACTTGCTCCAGAGGGAACTCATCACGCGTAAGTGTCTGC                                                                                                                                                                                                                                                                                                                                                                                                                                                                                                                                                                                                                                                                                                                                                                                                                                                                                                                                                                                                                                                                                                                                                                                                                                                                                                                                                                                                                            |
| <i>PD-1<sup>AID</sup></i>            | GCCTCCAAGACATGAGGATGGACATTTGTTCTTGGCCTCTTCTCGAGTCTGGAGGTGGCGGGAAGGAGAAGAGTGCTTGTCTTAAAGATCCAGCCAAACCTCCGGCCAAGGCACAAGTTGTGGGATGGCCACCGGTGAGATCATACCGGAAGAACGTGATGGTTTCTGCCAAAAATCAAGCGGTGGCCCGGAGGCGGCGGCTTCGTGAAGGTATCAATGGACGGAGCACCGTACTTGAGGAAAATCGATTTGAGGATGTATAAATAGCCAGATTCTTCAGCCATTAGCATGCTGCAGACCTCC                                                                                                                                                                                                                                                                                                                                                                                                                                                                                                                                                                                                                                                                                                                                                                                                                                                                                                                                                                                                                                                                                                                                                                                                                                                                                                                                                                                                                                                                                   |
| ORF                                  |                                                                                                                                                                                                                                                                                                                                                                                                                                                                                                                                                                                                                                                                                                                                                                                                                                                                                                                                                                                                                                                                                                                                                                                                                                                                                                                                                                                                                                                                                                                                                                                                                                                                                                                                                                                                   |
| <i>hCRBN-AirID</i>                   | ATGGCCGCGGAAGGAGATCAGCAGGACGCTGCGCACAACATGGGCAACCACCTGCCGCTCCTGCCTGCAGAGAGTGAAGGAAGAAGATGAAATGGAAAGTTGAAGACCAAGGATAGTAAAGAAGCCAAAAAACCAACATCATAAATTTGACACCATGCTGCCGACATCACATACATACCTAGGTGCTGATATGGAAGAATTTATGGCAGGACTTTGCACGATGACGACAGCTGTACAGGTGATCCAGTTCCTCCACAAGTGATGATGATCCTGATTCCCGGACAGACATTACCTCTTCAGCTTTTACCCCTCAAGAAGTCAGTATGGTGCGGAATTTAATTCAGAAAGATAGAACCTTTGCTGTTCTTGCATACAGCAATGTACAGGAAAAGGGAAGCAGATTGGGAACAACAGCAGAGATATATGCTATCGAGAAGAACAGGATTTGGAAATTCAGATAGAAAGTGAAGCAATTTGGAAGACAAAGGTTCAAAGTCCTTGAGCTAAGAACACAGTCAGATGGAATCCAGCAAGCTAAAGTGC                                                                                                                                                                                                                                                                                                                                                                                                                                                                                                                                                                                                                                                                                                                                                                                                                                                                                                                                                                                                                                                                                                                                                                                                                                   |
|                                      | AAATCTTCCGAATGTGTGTTGCCTTCAACCATGTCTGCAGTTCAATTAGAATCCCTCAATAAGTGCCAGATATTCCCTTCAAAACCTGTCTCAAGAGAAGACCAATGTTATATAAATGGTGGCAGAAATACCAAGAAGAGAAAGTTTCAATTGTGCAATCTAATCTATGGCCTCGCTGGCTGTATTCTTATATGATGCTGAGACCTTAATGGACAGAATCAAGAAACAGCTACGTGAATGGGATGAAAATCTAAAAGATGATTCTCTTCTTCAAATCCAATAGATTTTCTTACAGAGTAGCTGCTGTCTTCTTATTGATGATGTATTGAGAATTCAGCTCCTTAAAATTGGCAGTGCTATCCAGCGACTTCGCTGTGAATTAGACATTATGATAAAATGTACTTCCCTTTGCTGTAAACAATGTCAAGAAACAGAAATAACAACCAAAAATGAAATATTACGTTATCCTTATGTGGGCGGATGGCAGCTTATGTGAATCCTCATGGATATGTGCATGAGACACTTACTGTGTATAAGGCTTGAACCTTGAACTCTGATAGGCGGCCTTCTACAGAACACAGCTGGTTTCTTGGGTATGCTGGACTGTTGCCAGTGAAGATCTGTGCAAGCCATATTGGATGGAAGTTTACGGCCACCAAAAAAGACATGTACCTCAAAAATTTGGGGCTTAACCGCATCTGCTCTGTGTGCCACGATCCCAGACACTGAAGATGAAATAAGTCCAGACAAAGTAATACTTTGCTTGGGTACCATGAAGGACAACACCGTTCCGCTCACGCTTATCTCTATCCTTGCTGATGGTGAGTTCCACTCTGGTGAACAACCTTGGAGAGCAGCTCGGAATGTCTAGGGCTGCTATTAAACAAGCACATCAAGACCCTCCGTGACTGGGGAGTTGATGTGTTCAAGAGTTCAAGGTAAAGGGTACTGCCTTCTGAGCCTATCCAACCTTCTCGACGAAGAGAAGATCAGGCAGCAGCTTGATGAGGGATCTGTTACTGTCTCCCGGTGATCGATTTCGACCAACCAAGTACCTTCTCGATAGGCTCGATGAGCTTACCTCTGGTGATGTGTGATCGCTGAGTACCAACAGGCTGGAAGAGGAAGCAGAGGTAGGAAGTGGTTTTCTCCGTTCCGAGCTAACCTCTACCTCAGCATGTATTGGAGACTTGAGCAAGGACCTGCTGCTGCTATGGGACTTTCTCTCGTTATCGGAATCGTGATGGCTGAGACTTCCAAAAGCTTTGAGCTGACGGTGTAGAGTGAAGTGGCCTAACGACCTTTACCTCAACGATAGGAAGCTCGTAGGAAATCCTCGTTGAGATGACTGGAAGACTGGTGACGCTGCTCATATCGTGATTGGAGCTGGAATCAACCTCTCTATGCGTGAGCCTGAGACTGATGAGGTTGACCAGTCTTGGATCAACCTCCAAGAGGCTGGTATCACCATCGATAGAAACCAGCTTGTGCCAGGCTCATCAAGGATCTTAGATCTGCTCTCAGGCAGTTCGAGCAACAAGGACTTGCTCCATTCTCAGCAGATGGGAAGCTCTCGCAACTTCATCAACAGGCCAGTGAAGCTCATCATCGGTGATAGAGAGATCCACGGAATCGCTAGGGGAATCAACGAACAAGGGGCTCTTTTGCTTGAGCAGGACGGTGTGATTAAGCCTTGGATTGGAGGTGAGATCAGCCTCAGATCTGCTTA |



Source Data for Supplementary Information

Uncropped scan of blot from the Supplementary Figure 1b

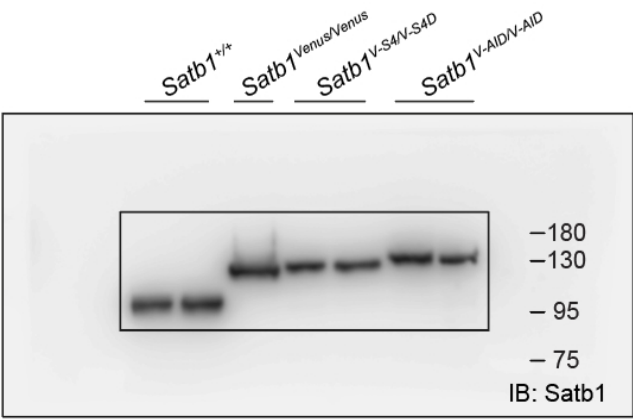

Uncropped scans of blots from the Supplementary Figure 4d

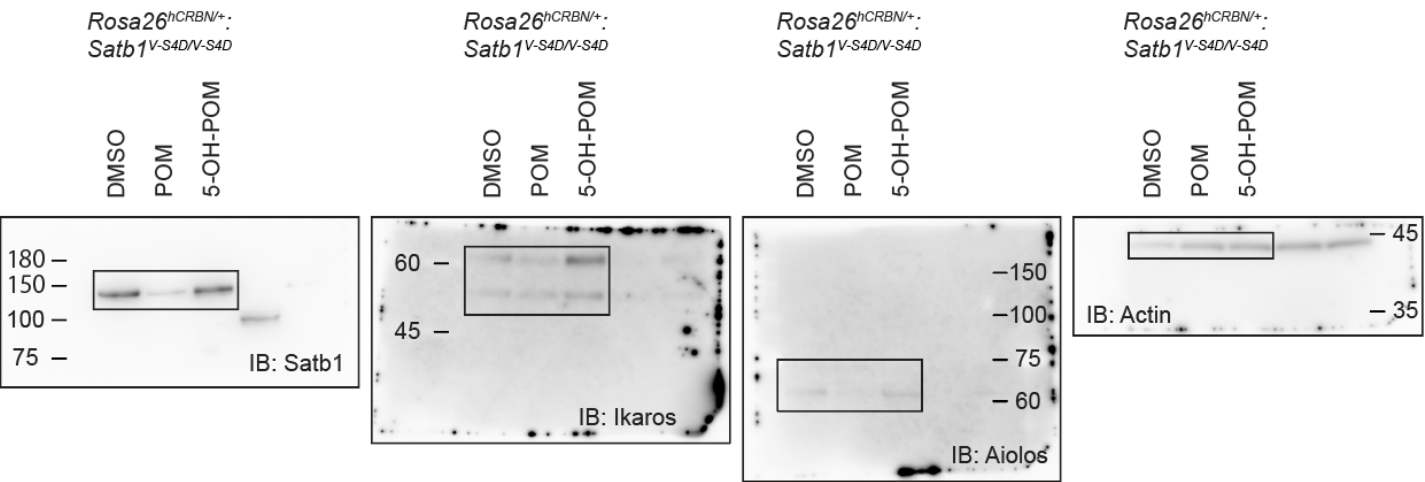

Supplement: MOESM1 [file 41467_2024_54308_MOESM1_ESM.pdf]
